# Supplementary material
Source: PubMed Central journal article supplement (PMC4351747)

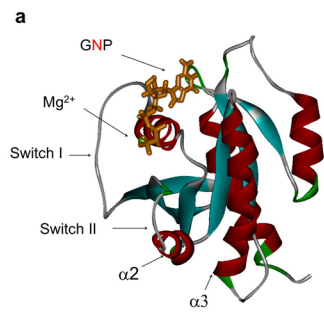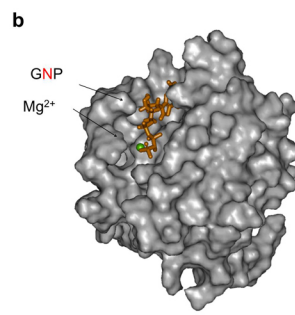



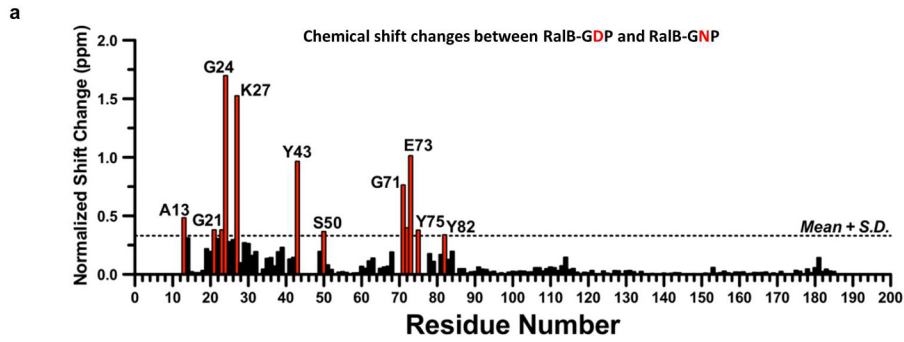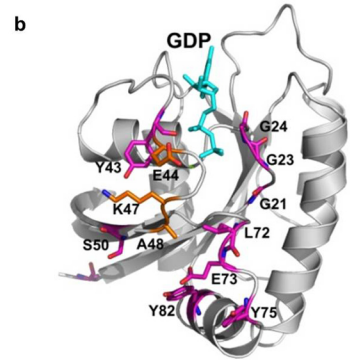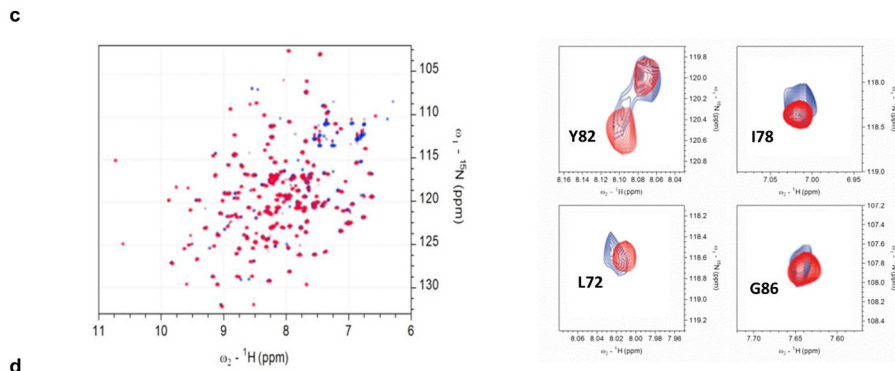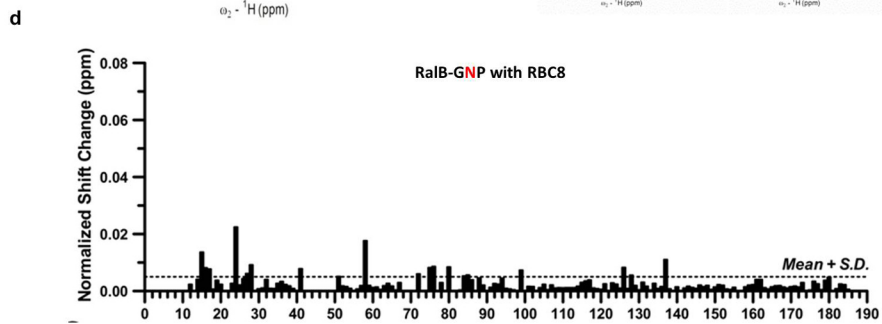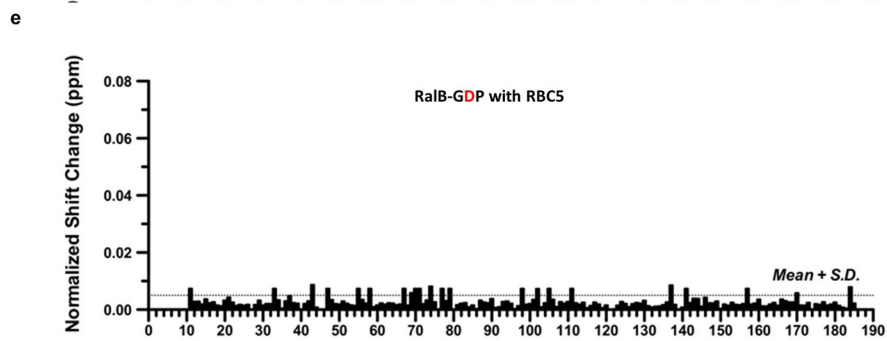

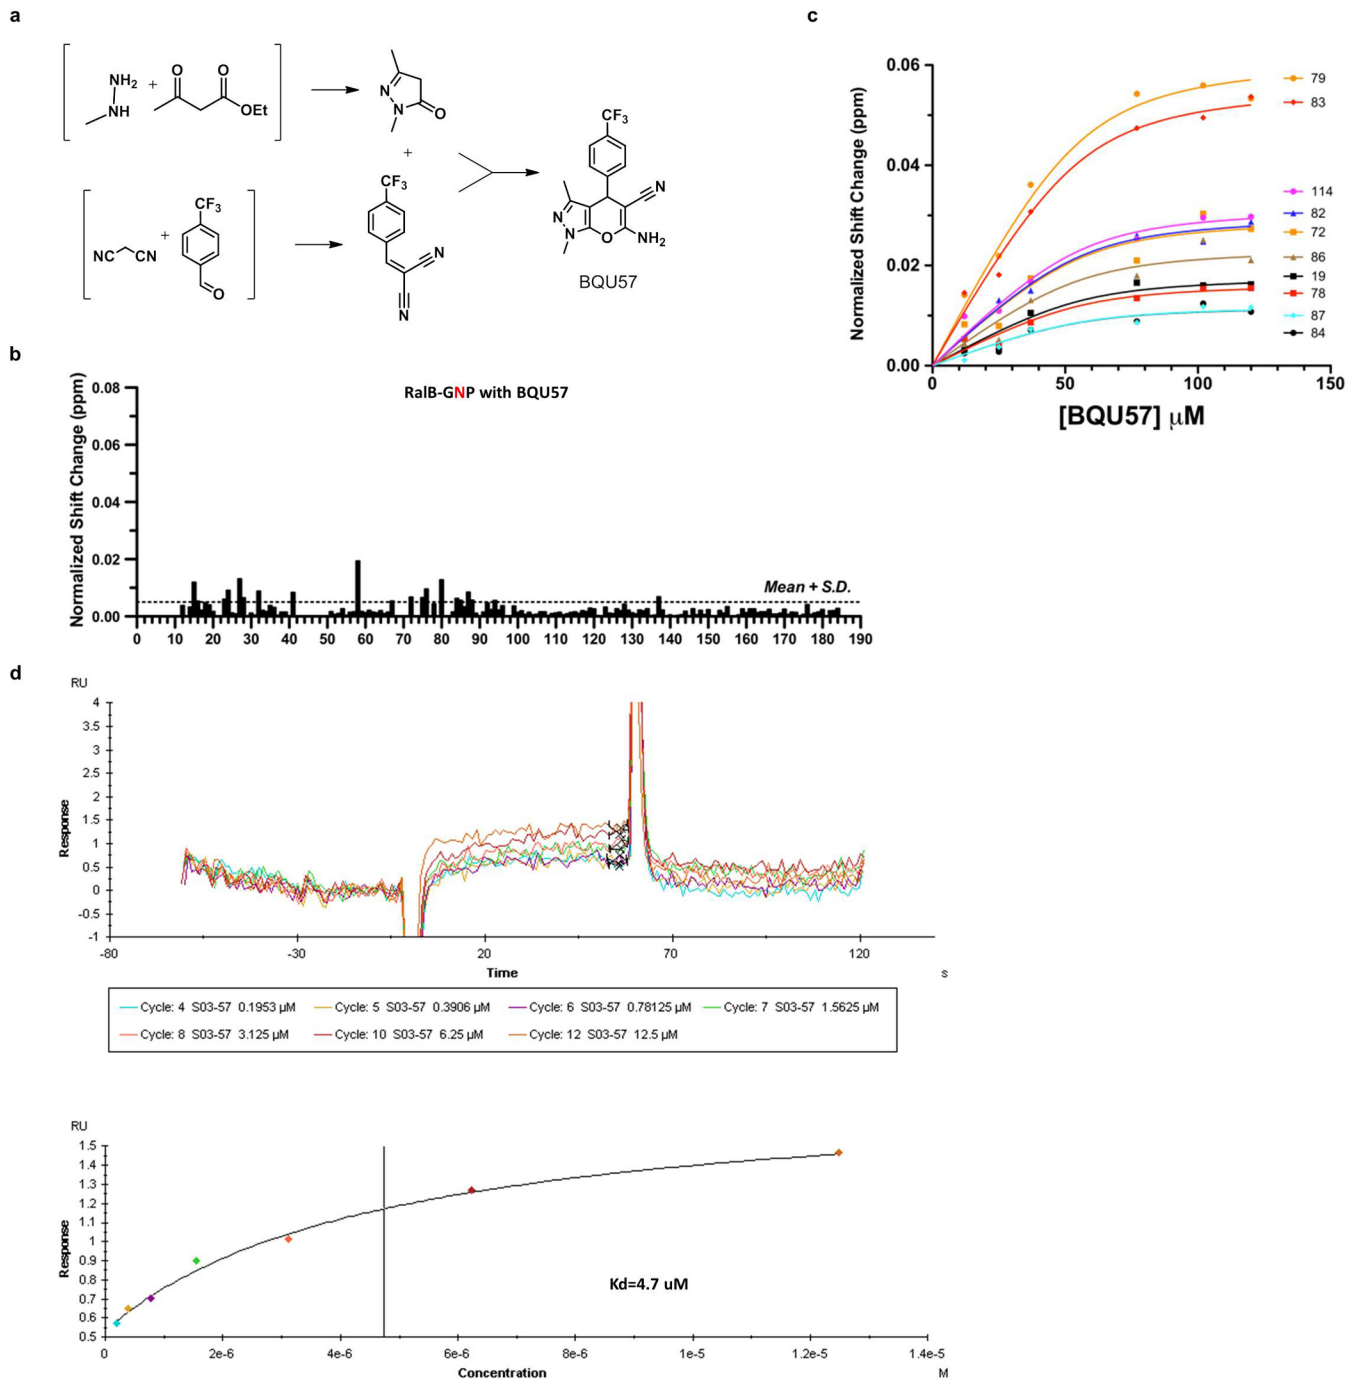

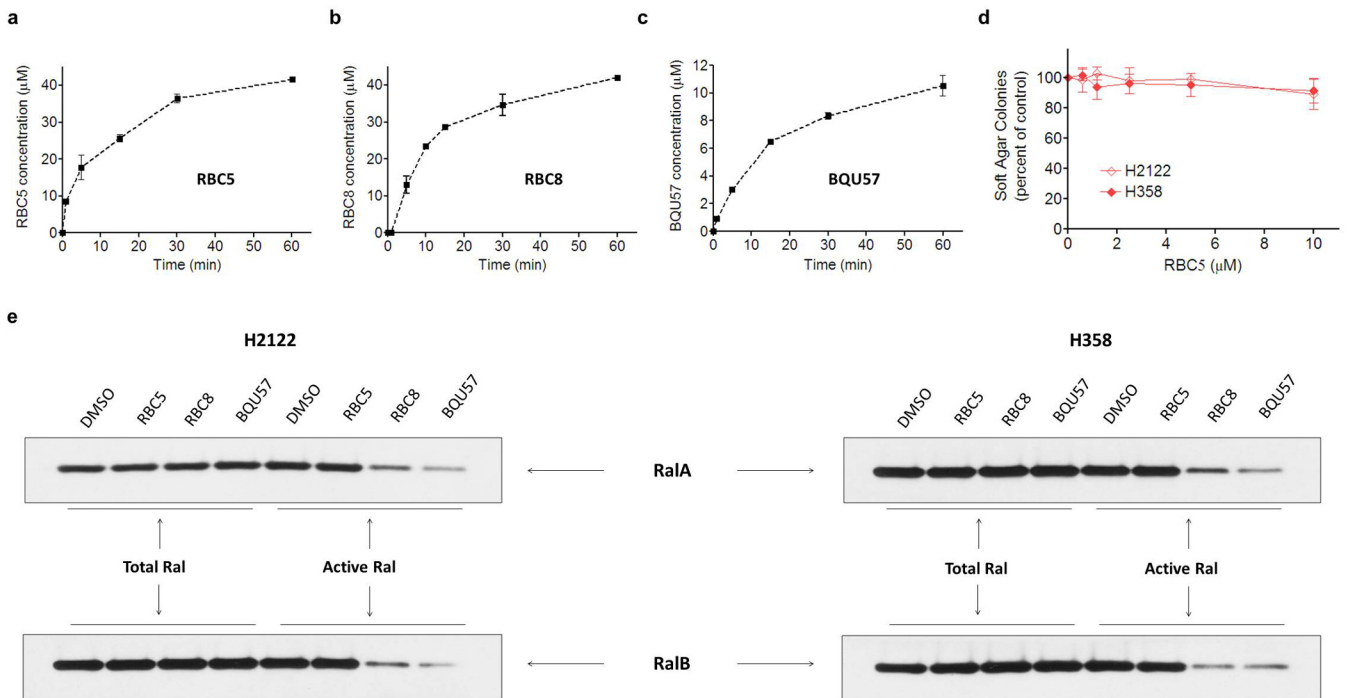

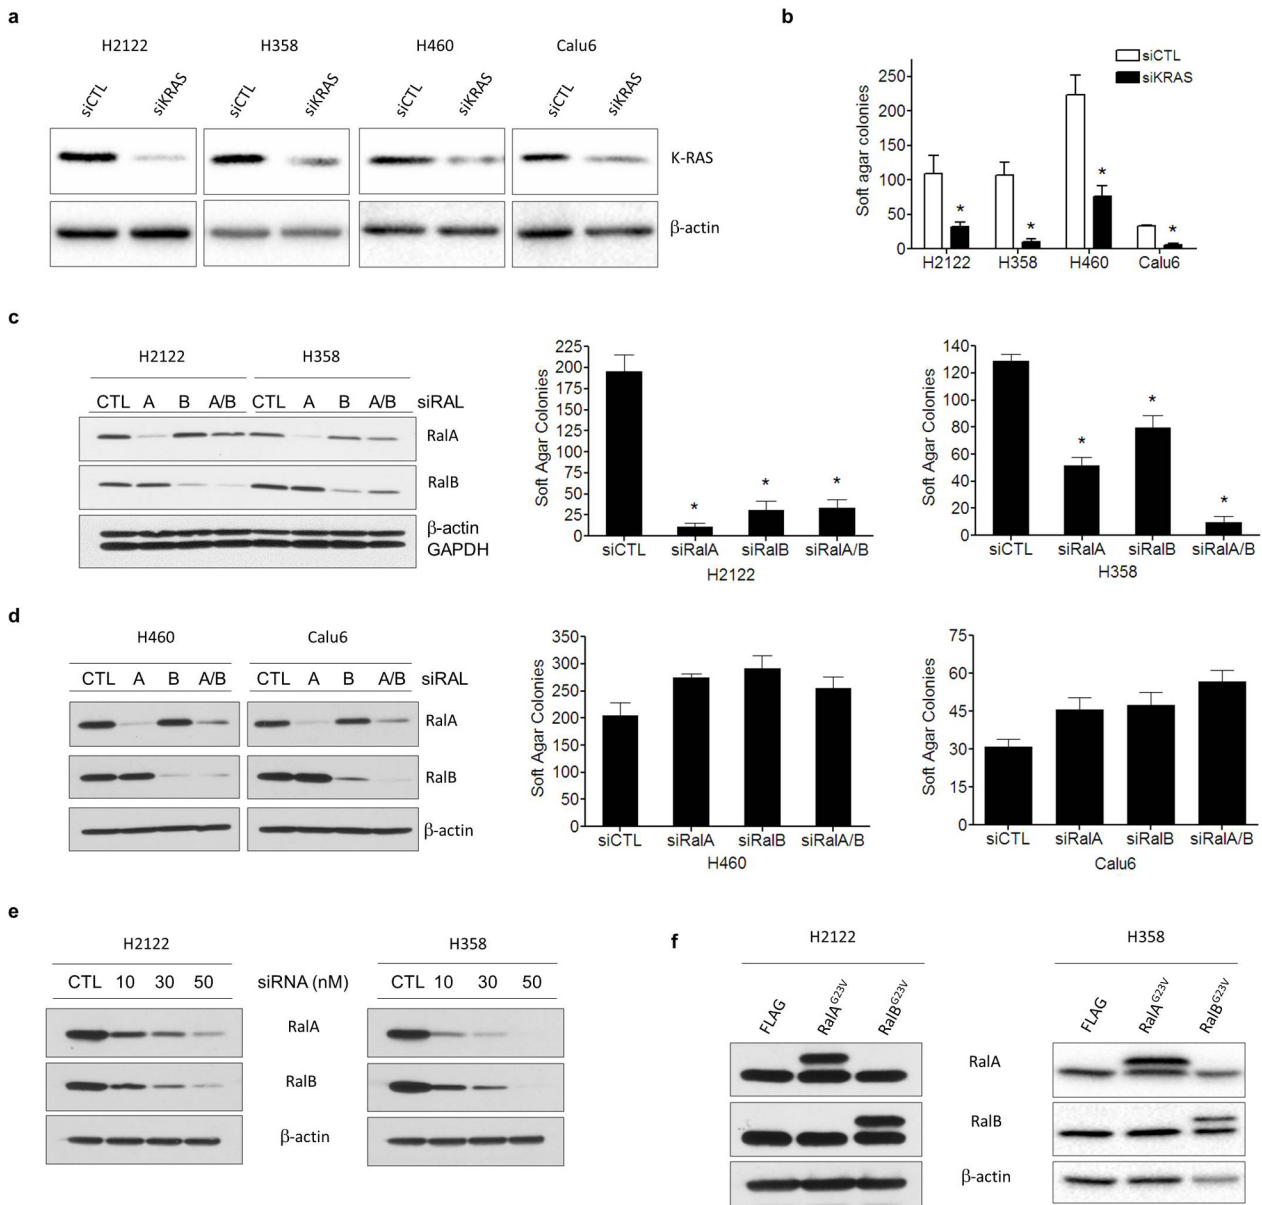

**a**

|                                                | RBC8             | BQU57           |
|------------------------------------------------|------------------|-----------------|
| Dose (mg/kg) i.p.; n=3                         | 50.0             | 50.0            |
| Co ( $\mu$ M)                                  | 41.2 $\pm$ 4.2   | 41.6 $\pm$ 5.1  |
| T <sub>1/2</sub> (hr)                          | 0.58 $\pm$ 0.26  | 1.50 $\pm$ 0.11 |
| AUC <sub>0-5hr</sub> ( $\mu$ g $\cdot$ h / mL) | 139.6 $\pm$ 18.8 | 28.6 $\pm$ 2.1  |

**b**

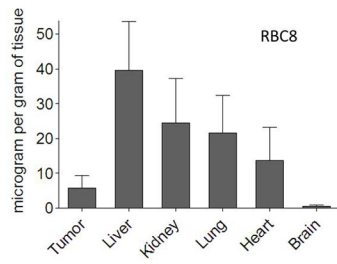

**c**

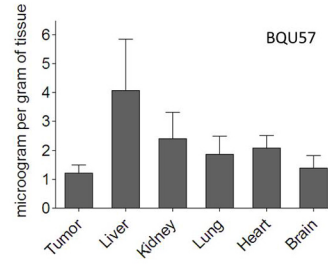

**d**

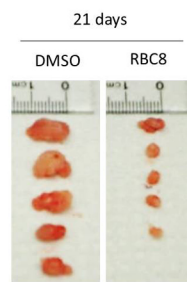

**e**

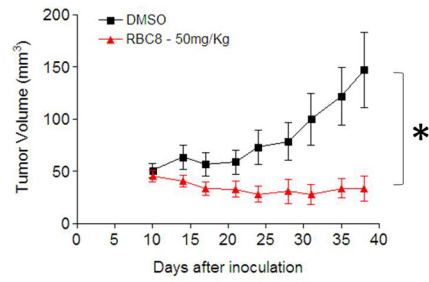

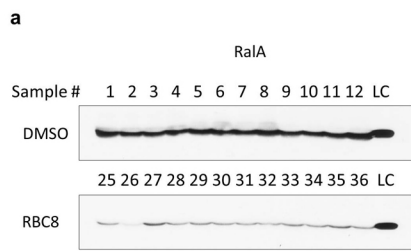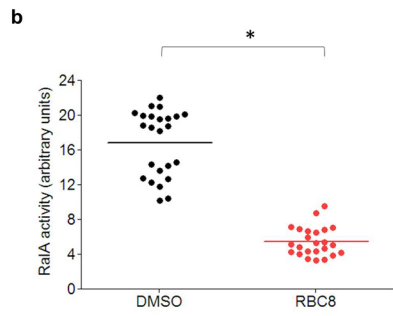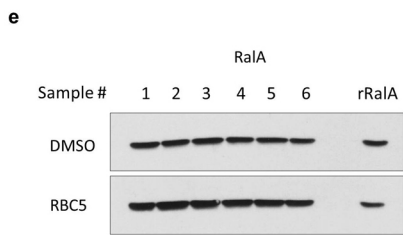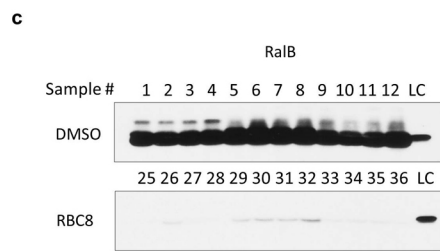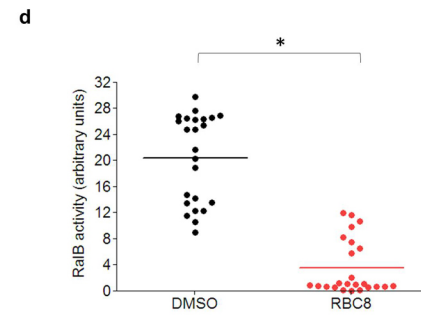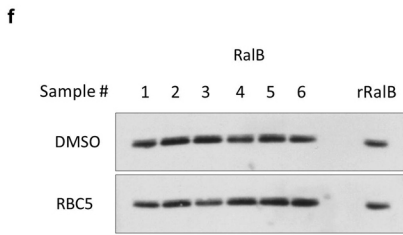

Supplement: NIHMS665413-supplement-Supp_Figures.pdf [file NIHMS665413-supplement-Supp_Figures.pdf]
